# Supplementary material for: Role of Cellulose Micro and Nano Crystals in Thin Film and Support Layer of Nanocomposite Membranes for Brackish Water Desalination
Source: MDPI journal article supplement (doi:10.3390/membranes9080101), 2019-08-15
Supplement: s1 [file s1]

# Role of cellulose micro and nano crystals in thin film and support layer of nanocomposite membranes for brackish water desalination

Mohammed Kadhom <sup>1,\*</sup>, Noor Albayati <sup>2</sup>, Suhaib Salih <sup>3</sup>, Mustafa Al-Furaiji <sup>4</sup>,  
Mohamed Bayati <sup>5,6</sup> and Baolin Deng <sup>5</sup>

<sup>1</sup> Department of Prostheses, Al-Dour Technical Institute, Northern Technical University, Saladin, Iraq

<sup>2</sup> Department of Science, College of Basic Education, University of Wasit, Azizia, Wasit, Iraq

<sup>3</sup> Department of Chemical Engineering, University of Tikrit, Saladin, Iraq

<sup>4</sup> Environment and Water Directorate, Ministry of Science and Technology, Baghdad, Iraq

<sup>5</sup> Department of Civil and Environmental Engineering, University of Missouri, Columbia, MO 65211, USA

<sup>6</sup> Department of Environmental Engineering, University of Tikrit, Saladin, Iraq

\* Correspondence: muhammed.ak@ntu.edu.iq or makbq6@mail.missouri.edu; Tel.: +964-7725-943-915

**Table S1.** CNCs gel characterizations.

| <i>Parameter</i>      | <i>Value</i> | <i>Units</i>      | <i>Test Method</i>                  |
|-----------------------|--------------|-------------------|-------------------------------------|
| Solids content        | 8%           | w/w               |                                     |
| Crystallinity index   | 80%          |                   | Segal method                        |
| Crystal length        | 100-150      | nm                | TEM                                 |
| Crystal diameter      | 9-14         | nm                | TEM                                 |
| Hydrodynamic diameter | 117.2        | nm                | DLS (dynamic light scattering)      |
| Surface area          | ≈ 250        | m <sup>2</sup> /g |                                     |
| Zeta potential        | -30.2        | mV                | DLS                                 |
| Carboxyl content      | 0.129        | mmol/g            | Conductivity titration + FTIR Image |
| pH                    | 5.599        |                   |                                     |
| Conductivity          | 317          | μS/cm             |                                     |

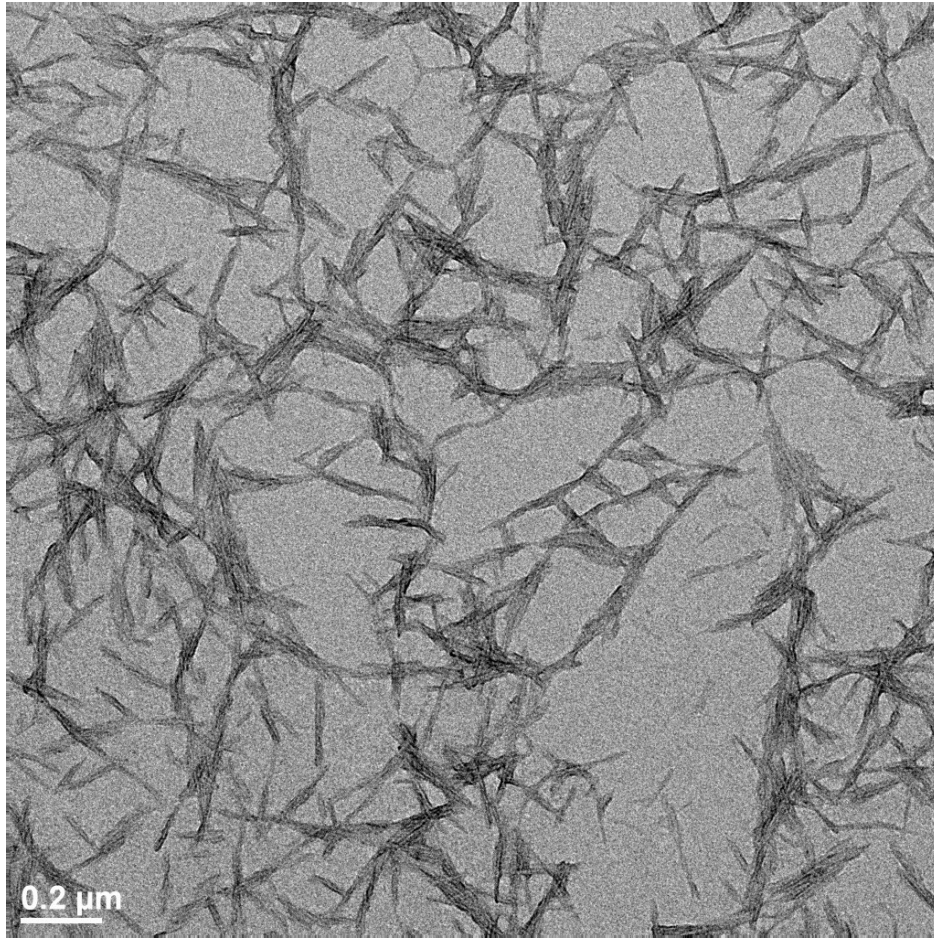

**Figure S1.** TEM image for CNCs captured by FEI Tecnai 12 BioTwin microscope which was operated at 120 kV. (Blue Goose Biorefineries Inc.).

(a)

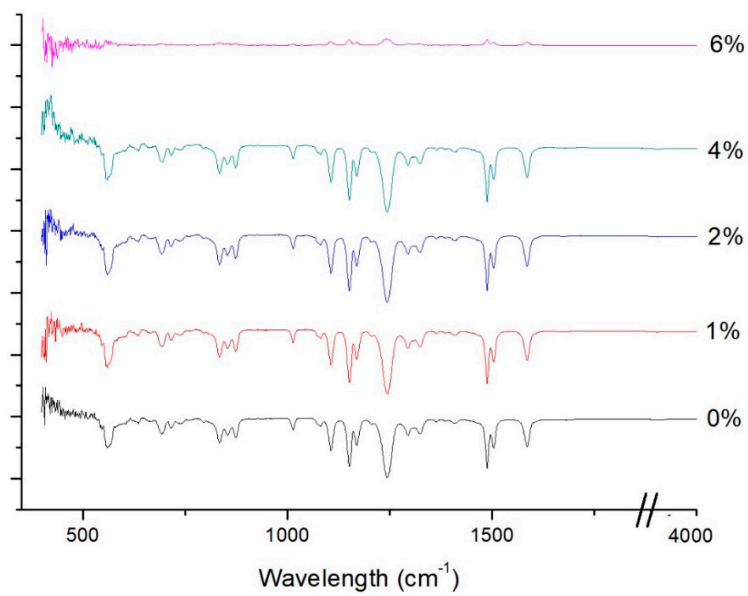

(b)

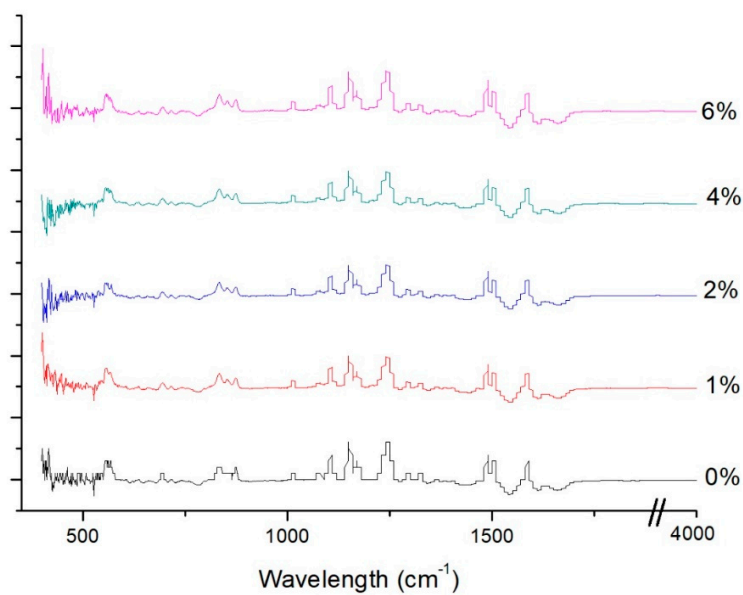

**Figure S2.** ATR FTIR of (a) SL, (b) TFC membrane with different loading ratios of CNCs in the support layer.
